# Supplementary material for: Dendrite branching and self-avoidance are controlled by Turtle, a conserved IgSF protein in Drosophila
Source: Oxford University Press journal article supplement (doi:10.1242/dev.040220), 2009-09-25
Supplement: dev040220tables1.pdf [file dev040220tables1.pdf]

**Table S1. Genetic interaction experiments for *tutI* and *trc***

| Genotype                                                                 | <i>n</i> | Mean | s.e.m. |
|--------------------------------------------------------------------------|----------|------|--------|
| <b>Class I (ddaE): termini per neuron*</b>                               |          |      |        |
| <i>tutI</i> <sup>23</sup> /+                                             | 21       | 29.0 | 0.9    |
| <i>trc</i> <sup>1</sup> /+                                               | 32       | 26.8 | 0.8    |
| <i>tutI</i> <sup>23</sup> /+; <i>trc</i> <sup>1</sup> /+                 | 28       | 27.9 | 0.7    |
| <b>Class IV (ddaC): crossing points per 1000 μm of dendritic length†</b> |          |      |        |
| <i>tutI</i> <sup>23</sup> /+                                             | 10       | 7.5  | 0.4    |
| <i>trc</i> <sup>1</sup> /+                                               | 11       | 5.8  | 0.4    |
| <i>tutI</i> <sup>23</sup> /+; <i>trc</i> <sup>1</sup> /+                 | 14       | 8.1  | 0.5    |

Double heterozygotes for *trc* and *tutI* have no enhanced branching defects (class I) or self-avoidance defects (class IV) compared with *tutI* heterozygotes alone.

*n*, number of neurons examined; s.e.m., standard error of the mean.

\*There is no significant difference between any two of the three genotypes listed (ANOVA, Tukey, *P*=0.18).

†*tutI*<sup>23</sup>/+; *trc*<sup>1</sup>/+ double heterozygotes are not significantly different from *tutI*<sup>23</sup>/+, but *trc*<sup>1</sup>/+ heterozygotes and *tutI*<sup>23</sup>/+ heterozygotes are different from one another (ANOVA, Tukey, *P*=0.0022).
