# Supplementary figures and images for: Dendrite branching and self-avoidance are controlled by Turtle, a conserved IgSF protein in Drosophila
Source: Oxford University Press journal article supplement (doi:10.1242/dev.040220), 2009-09-25

**A**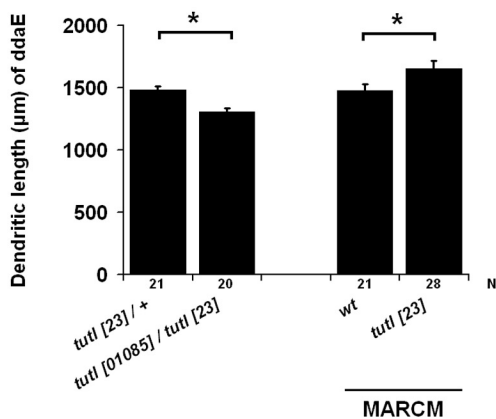**B**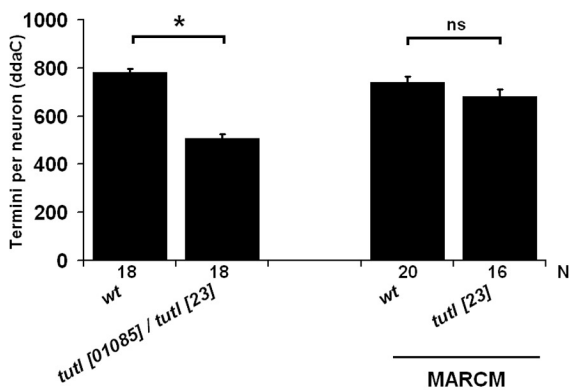**C**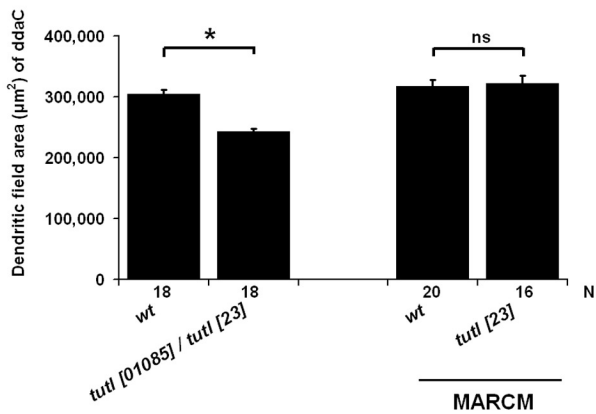

Supplement: dev040220-sup-040220figs2.pdf [file dev040220-sup-040220figs2.pdf]

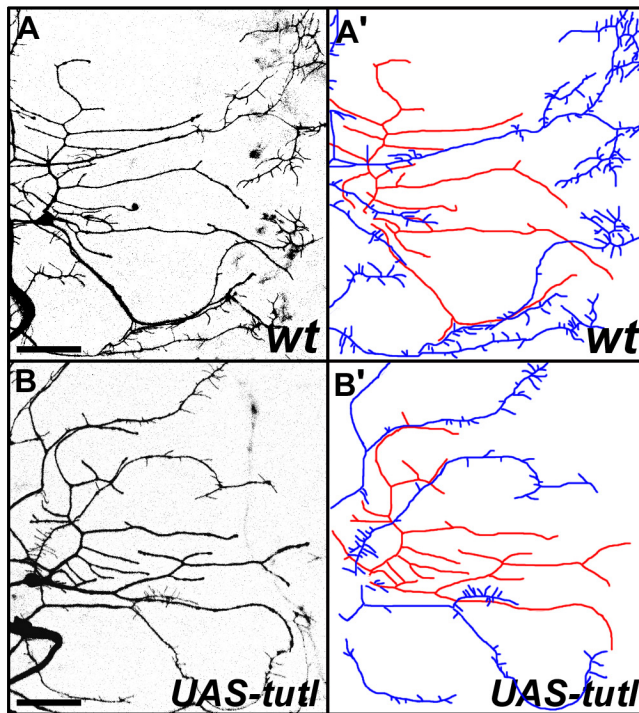

Supplement: dev040220-sup-040220figs3.pdf [file dev040220-sup-040220figs3.pdf]

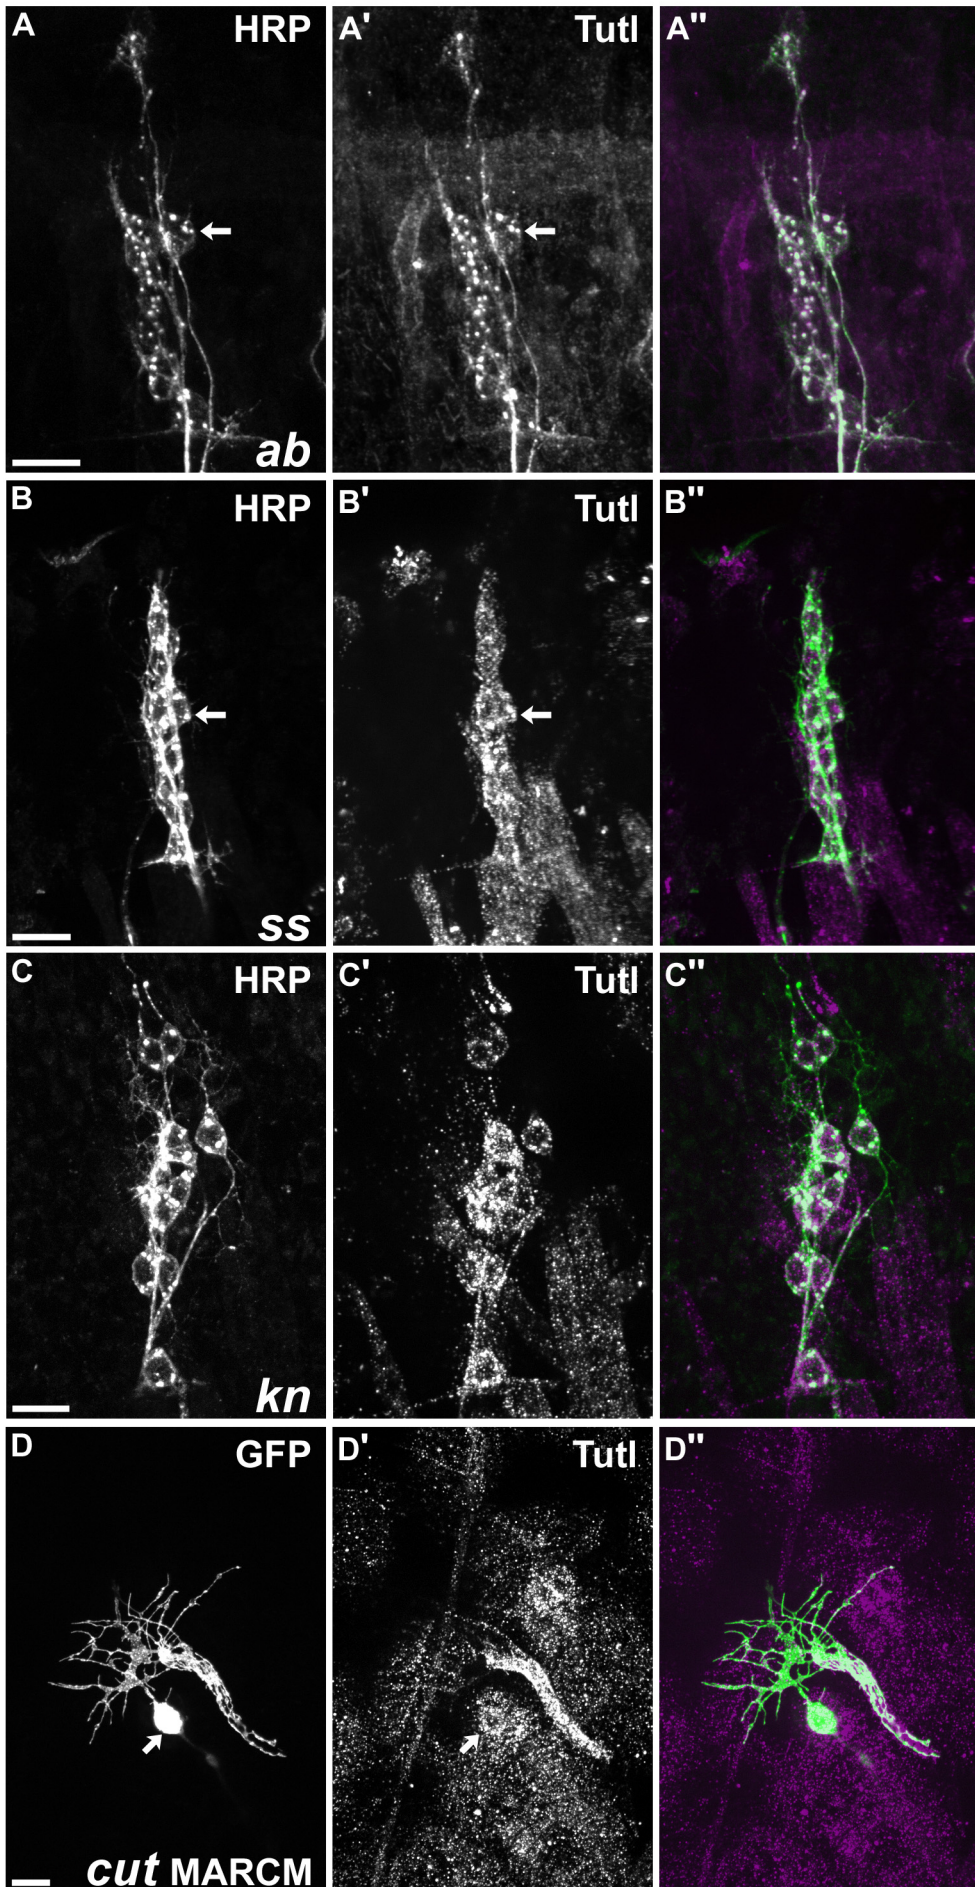

Supplement: dev040220-sup-040220figs4.pdf [file dev040220-sup-040220figs4.pdf]

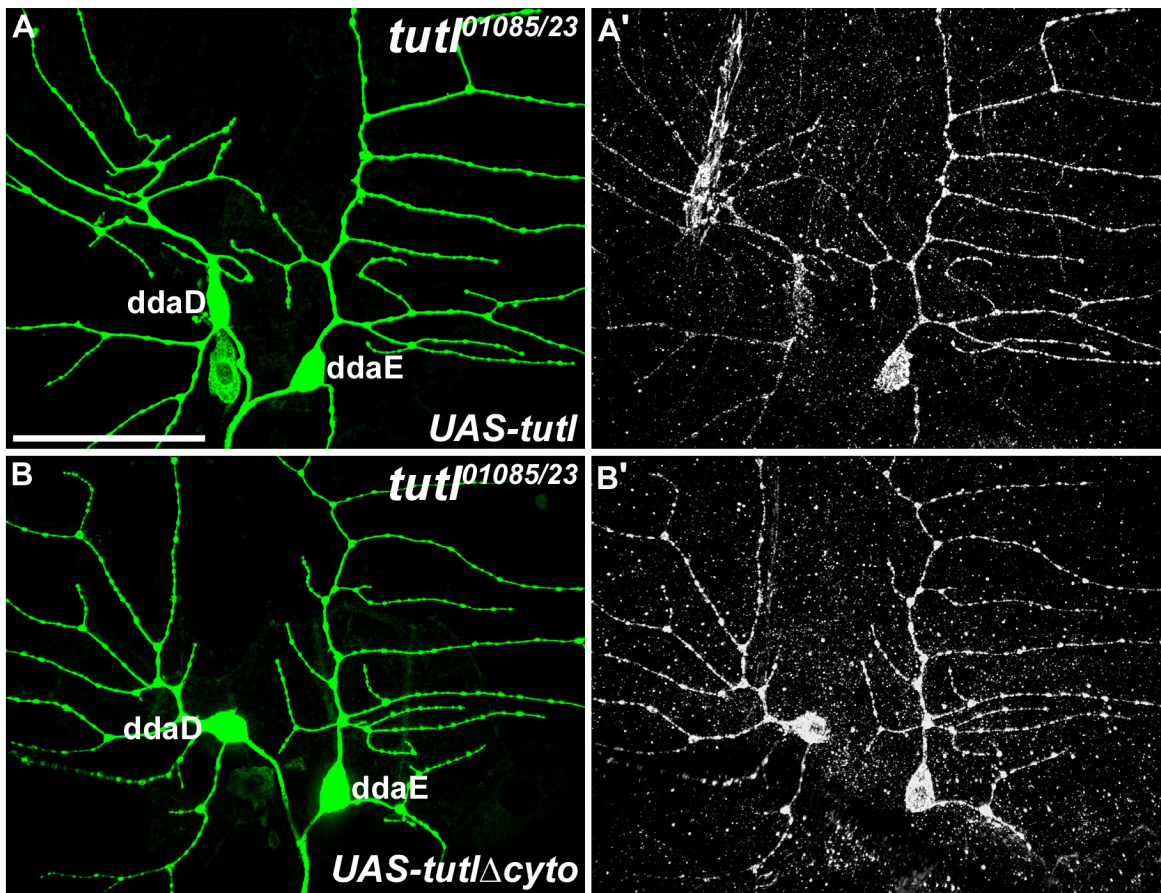

Supplement: dev040220-sup-040220figs5.pdf [file dev040220-sup-040220figs5.pdf]
